# Supplementary material for: 3-Methyl-1,2,3-triazolium-1N-dinitromethylylide and the strategy of zwitterionic dinitromethyl groups in energetic materials design
Source: Royal Society of Chemistry journal article supplement (doi:10.1039/d1ra00953b), 2021-01-01

## Supporting Information

### 3-methyl-1,2,3-triazolium-1N-dinitromethylide and the strategy of zwitterionic dinitromethyl groups in energetic materials design.

Dominique R. Wozniak<sup>‡</sup>, Matthias Zeller<sup>§</sup>, Edward F. C. Byrd<sup>||</sup>, Davin G. Piercey<sup>\*,†</sup>

<sup>‡</sup>Department of Materials Engineering, Purdue Energetics Research Center, Purdue University, 205 Gates Road West Lafayette, IN 47904, United States

<sup>§</sup> Department of Chemistry, Purdue University, West Lafayette, Indiana 47907, United States

<sup>||</sup> U.S. Army Research Laboratory, Aberdeen Proving Ground, Maryland 21500, United States

<sup>†</sup>Department of Materials Engineering, Department of Mechanical Engineering Purdue Energetics Research Center, Purdue University, 205 Gates Road West Lafayette, IN 47904, United States

[dpiercey@purdue.edu](mailto:dpiercey@purdue.edu)

## X-Ray Crystallography

Figure S1. OTREP plot of 1

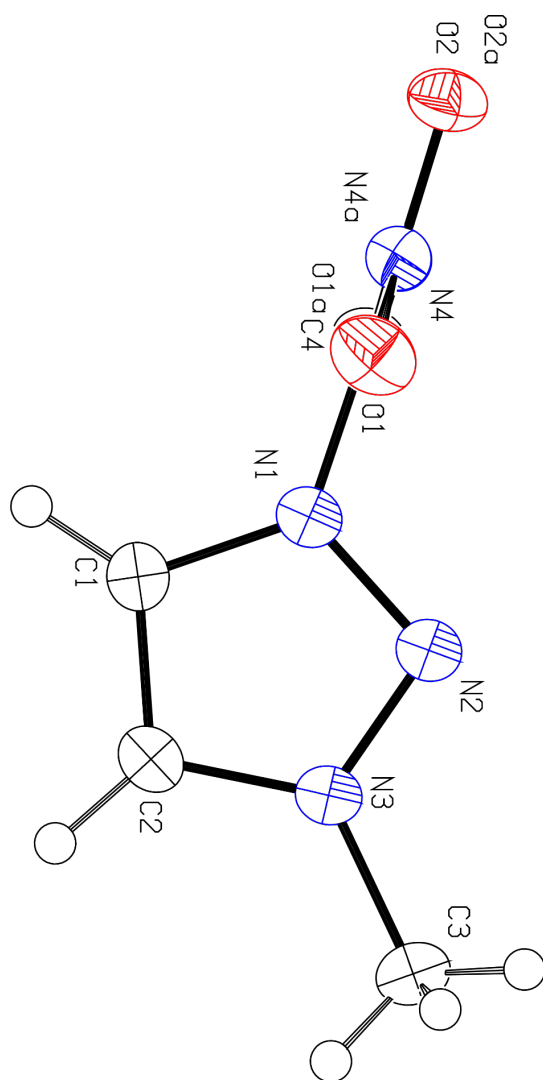

**Figure S2.** Figure of compound **1**.

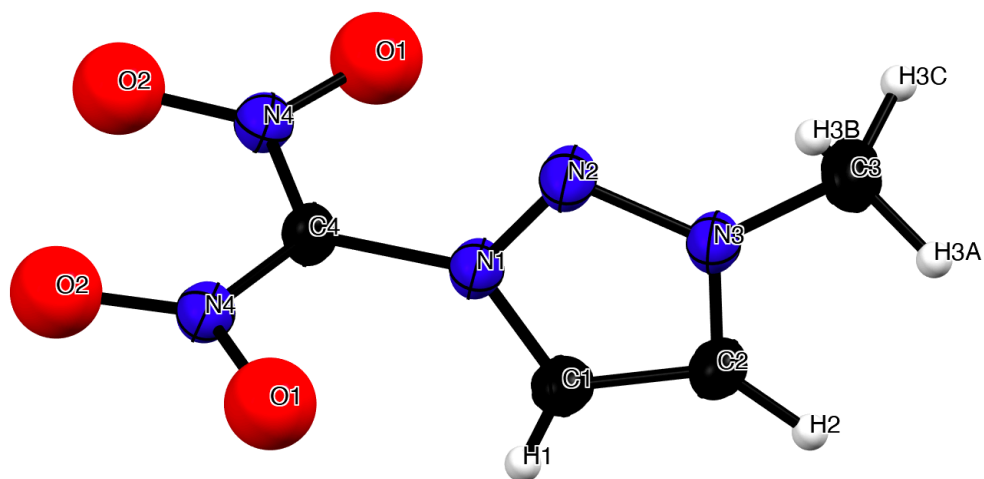

**Table S1.** Experimental details

|                                            | 3-methyl-1,2,3-triazolium-1N-dinitromethylide ( <b>1</b> )  |
|--------------------------------------------|-------------------------------------------------------------|
| Crystal data                               |                                                             |
| Chemical formula                           | C <sub>4</sub> H <sub>5</sub> N <sub>5</sub> O <sub>4</sub> |
| <i>M<sub>r</sub></i>                       | 187.13                                                      |
| Crystal system, space group                | Orthorhombic, <i>Cmca</i>                                   |
| Temperature (K)                            | 150                                                         |
| <i>a</i> , <i>b</i> , <i>c</i> (Å)         | 7.7002 (7), 14.3978 (16), 12.7602 (11)                      |
| <i>V</i> (Å <sup>3</sup> )                 | 1414.7 (2)                                                  |
| <i>Z</i>                                   | 8                                                           |
| <i>F</i> (000)                             | 768                                                         |
| <i>D<sub>x</sub></i> (Mg m <sup>-3</sup> ) | 1.757                                                       |
| Radiation type                             | Cu <i>K</i> α                                               |
| No. of reflections for cell measurement    | 3719                                                        |
| θ range (°) for cell measurement           | 6.2–79.9                                                    |
| μ (mm <sup>-1</sup> )                      | 1.38                                                        |
| Crystal shape                              | Plate                                                       |
| Colour                                     | Colourless                                                  |
| Crystal size (mm)                          | 0.16 × 0.15 × 0.02                                          |
| Data collection                            |                                                             |

|                                                                            |                                                                                                                                    |
|----------------------------------------------------------------------------|------------------------------------------------------------------------------------------------------------------------------------|
| Diffractometer                                                             | Bruker AXS D8 Quest diffractometer with PhotonIII_C14 charge-integrating and photon counting pixel array detector                  |
| Radiation source                                                           | I-mu-S microsource X-ray tube                                                                                                      |
| Monochromator                                                              | Laterally graded multilayer (Goebel) mirror                                                                                        |
| Detector resolution (pixels mm <sup>-1</sup> )                             | 7.4074                                                                                                                             |
| Scan method                                                                | $\omega$ and phi scans                                                                                                             |
| Absorption correction                                                      | Multi-scan, <i>SADABS</i> 2016/2: Krause, L., Herbst-Irmer, R., Sheldrick G.M. & Stalke D., <i>J. Appl. Cryst.</i> 48 (2015) 3-10. |
| $T_{\min}$ , $T_{\max}$                                                    | 0.613, 0.754                                                                                                                       |
| No. of measured, independent and observed [ $I > 2\sigma(I)$ ] reflections | 5056, 812, 741                                                                                                                     |
| $R_{\text{int}}$                                                           | 0.037                                                                                                                              |
| $\theta$ values (°)                                                        | $\theta_{\max} = 79.9$ , $\theta_{\min} = 6.2$                                                                                     |
| $(\sin \theta/\lambda)_{\max}$ (Å <sup>-1</sup> )                          | 0.639                                                                                                                              |
| Range of $h, k, l$                                                         | $h = -7 \rightarrow 9$ , $k = -18 \rightarrow 17$ , $l = -15 \rightarrow 15$                                                       |
| Refinement                                                                 |                                                                                                                                    |
| Refinement on                                                              | $F^2$                                                                                                                              |
| $R[F^2 > 2\sigma(F^2)]$ , $wR(F^2)$ , $S$                                  | 0.046, 0.143, 1.16                                                                                                                 |
| No. of reflections                                                         | 812                                                                                                                                |
| No. of parameters                                                          | 72                                                                                                                                 |
| No. of restraints                                                          | 0                                                                                                                                  |
| H-atom treatment                                                           | H-atom parameters constrained                                                                                                      |
| Weighting scheme                                                           | $w = 1/[\sigma^2(F_o^2) + (0.0842P)^2 + 0.8362P]$ where $P = (F_o^2 + 2F_c^2)/3$                                                   |
| $(\Delta/\sigma)_{\max}$                                                   | < 0.001                                                                                                                            |
| $\Delta\rho_{\max}$ , $\Delta\rho_{\min}$ (e Å <sup>-3</sup> )             | 0.32, -0.25                                                                                                                        |
| Extinction method                                                          | <i>SHELXL2018/3</i> (Sheldrick 2018), $F_c^* = kFc[1 + 0.001x Fc^2\lambda^3/\sin(2\theta)]^{-1/4}$                                 |
| Extinction coefficient                                                     | 0.0052 (11)                                                                                                                        |

## Detonation Properties

**Table S2.** Energetic properties of **1** compared to HMX and RDX

|                                                                                  | <b>1</b>                                                    | <b>HMX</b>                                       | <b>RDX</b>                                                  | <b>TNT<sup>26</sup></b>                       |
|----------------------------------------------------------------------------------|-------------------------------------------------------------|--------------------------------------------------|-------------------------------------------------------------|-----------------------------------------------|
| Formula                                                                          | C <sub>4</sub> H <sub>5</sub> N <sub>5</sub> O <sub>4</sub> | (CH <sub>2</sub> NNO <sub>2</sub> ) <sub>4</sub> | C <sub>3</sub> H <sub>6</sub> N <sub>6</sub> O <sub>6</sub> | C <sub>6</sub> H <sub>3</sub> CH <sub>3</sub> |
| FW / [g mol <sup>-1</sup> ]                                                      | 187.13                                                      | 296.16                                           | 222.12                                                      | 227.13                                        |
| IS / [J] <sup>a</sup>                                                            | 8                                                           | 7                                                | 7.5                                                         | 15                                            |
| FS / [N] <sup>b</sup>                                                            | 144-160                                                     | 112                                              | 120                                                         | 240                                           |
| N / [%] <sup>c</sup>                                                             | 36.74                                                       | 37.84                                            | 37.84                                                       | 0                                             |
| Ω / [%] <sup>d</sup>                                                             | -55.58                                                      | -21.61                                           | -21.61                                                      | -73.96                                        |
| T <sub>dec</sub> / [°C] <sup>e</sup>                                             | 150                                                         | 275                                              | 205                                                         | 295                                           |
| ρ / [g cm <sup>-3</sup> ] <sup>f</sup>                                           | 1.757                                                       | 1.905                                            | 1.858                                                       | 1.65                                          |
| ρ / [g cm <sup>-3</sup> ] <sup>calc</sup>                                        | 1.786                                                       | -                                                | -                                                           | -                                             |
| Δ <sub>f</sub> H <sub>m<sup>o</sup></sub> / [kJ mol <sup>-1</sup> ] <sup>g</sup> | 224.2                                                       | 74.8                                             | 86.3                                                        | -59.3                                         |
| <b>EXPLO6</b>                                                                    |                                                             |                                                  |                                                             |                                               |
| -Δ <sub>Ex</sub> U <sup>o</sup> / [kJ kg <sup>-1</sup> ] <sup>h</sup>            | -5303                                                       | -5700                                            | -5740                                                       | -5227                                         |
| T <sub>det</sub> / [K] <sup>i</sup>                                              | 3525                                                        | 4117                                             | 3745                                                        | 3657                                          |
| P <sub>CJ</sub> / [kbar] <sup>j</sup>                                            | 272                                                         | 378                                              | 336                                                         | 21.6                                          |
| V <sub>det</sub> / [m s <sup>-1</sup> ] <sup>k</sup>                             | 8162                                                        | 9193                                             | 8801                                                        | 7253                                          |
| V <sub>o</sub> / [L kg <sup>-1</sup> ] <sup>l</sup>                              | 739                                                         | 763                                              | 783                                                         | 574                                           |

[a] impact sensitivity (BAM drophammer (1 of 6)); [b] friction sensitivity (BAM friction tester (1 of 6)); [c] nitrogen content; [d] oxygen balance ( $\Omega = (xO - 2yC - 1/2zH)M/1600$ ); [e] decomposition temperature from DSC ( $\beta = 5$  °C); [f] from X-ray diffraction; [g] calculated heat of formation; [h] energy of explosion; [i] explosion temperature; [j] detonation pressure; [k] detonation velocity; [l] volume of detonation gases (assuming only gaseous products).

# NMR

Figure S3.  $^1\text{H}$  NMR of **1** (DMSO- $d_6$ )

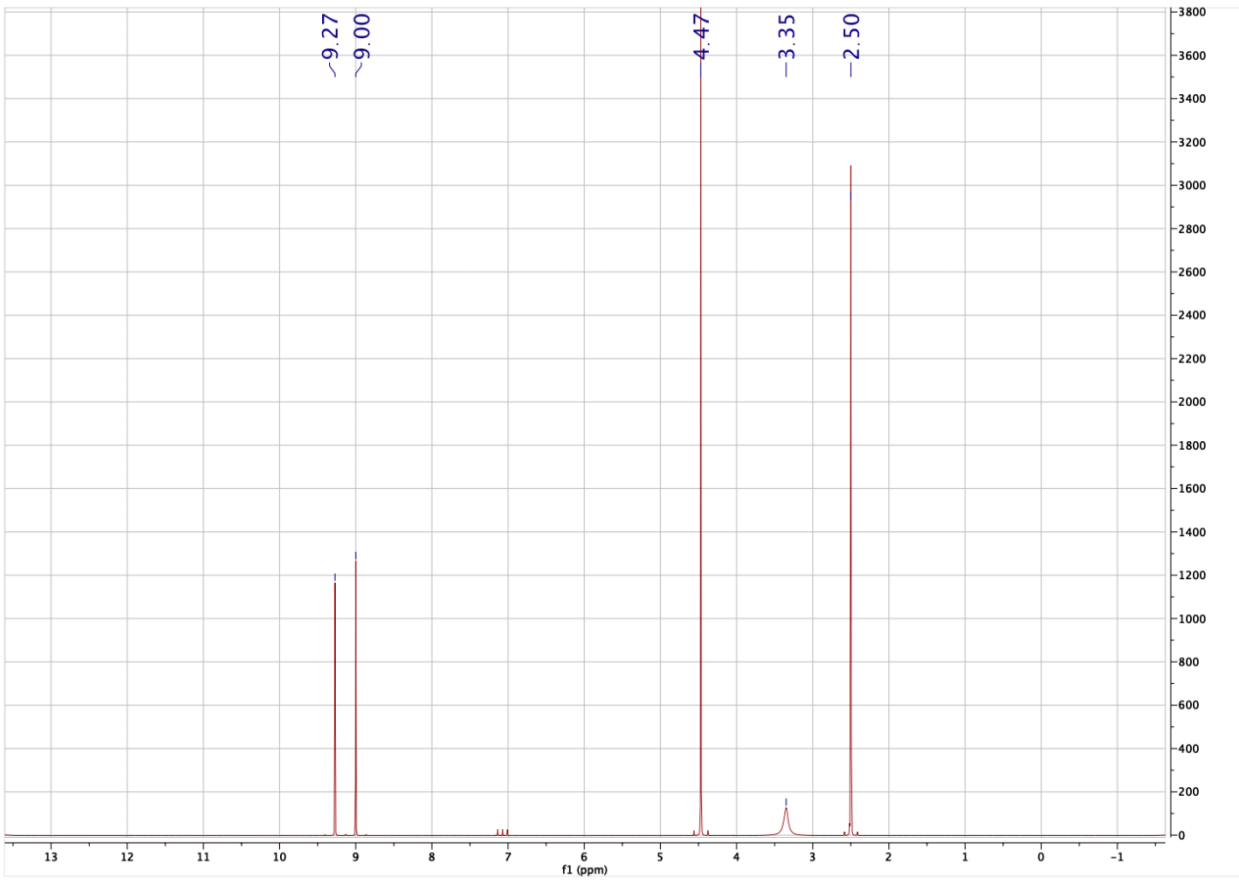

Figure S4.  $^{13}\text{C}$  NMR 1 (DMSO- $d_6$ )

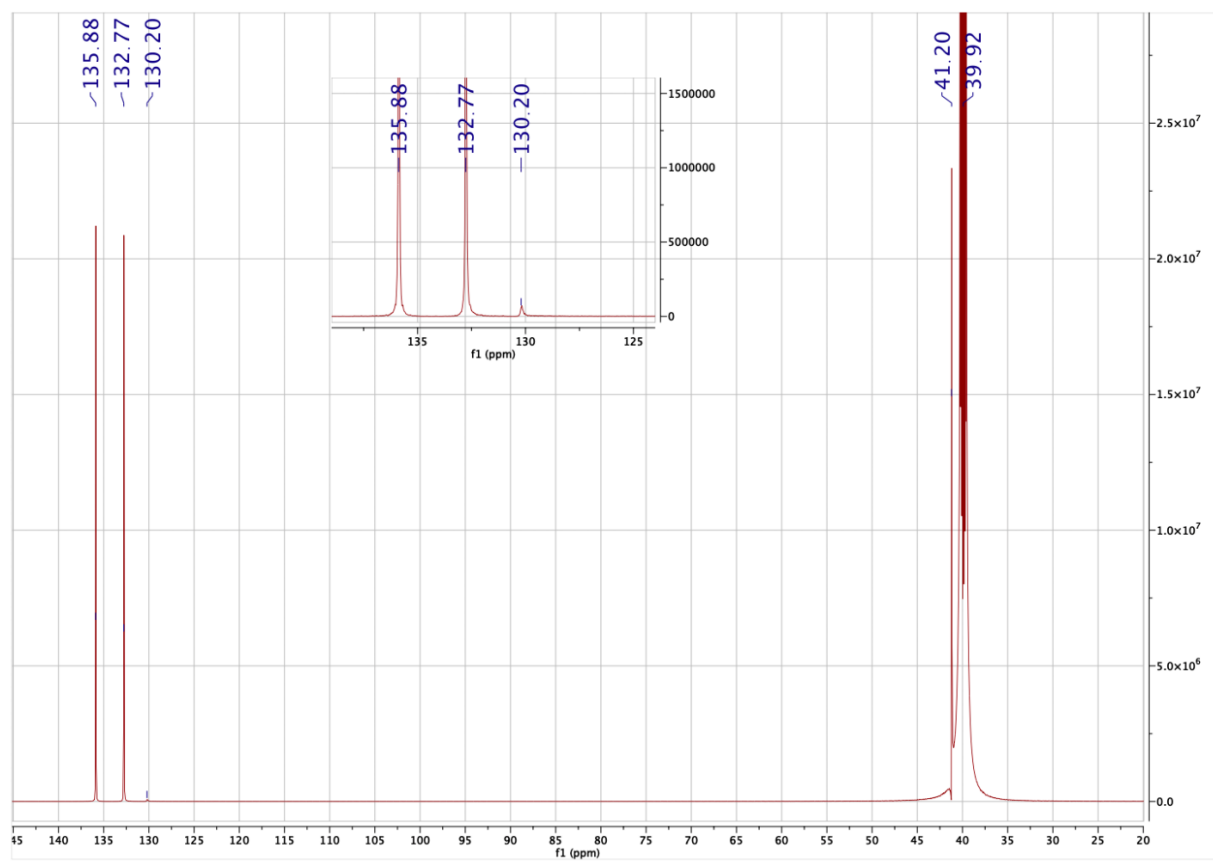

Supplement: d1ra00953b1.pdf [file d1ra00953b1.pdf]
